# Supplementary material for: Unique hydrogenated Ni/NiO core/shell 1D nano-heterostructures with superior electrochemical performance as supercapacitors
Source: Royal Society of Chemistry journal article supplement (doi:10.1039/c3ta12736b), 2013-01-01
Supplement: c3ta12736b.pdf [file c3ta12736b.pdf]

## Supporting information

### Unique Hydrogenated Ni-NiO Core-Shell 1D Nano-heterostructures With Superior Electrochemical Performance as Supercapacitor

*Ashutosh K. Singh,<sup>‡,†</sup> Debasish Sarkar,<sup>‡,†</sup> Gobinda Gopal Khan,<sup>#,‡,\*</sup> and Kalyan Mandal<sup>†</sup>*

<sup>†</sup> Department of Condensed Matter Physics and Material Sciences,  
S. N. Bose National Centre for Basic Sciences,  
Block JD, Sector III, Salt Lake City, Kolkata 700 098, India

<sup>#</sup> Center for Research in Nanoscience and Nanotechnology,  
University of Calcutta,  
Technology Campus, Block JD2, Sector III, Salt Lake City, Kolkata 700 098, India

---

\*To whom correspondence should be addressed

Center for Research in Nanoscience and Nanotechnology,  
University of Calcutta,  
Technology Campus, Block JD2, Sector III, Salt Lake City, Kolkata 700 098, India

\* E-mail: gobinda.gk@gmail.com, Corresponding author.

## MATERIAL CHARACTERIZATION.

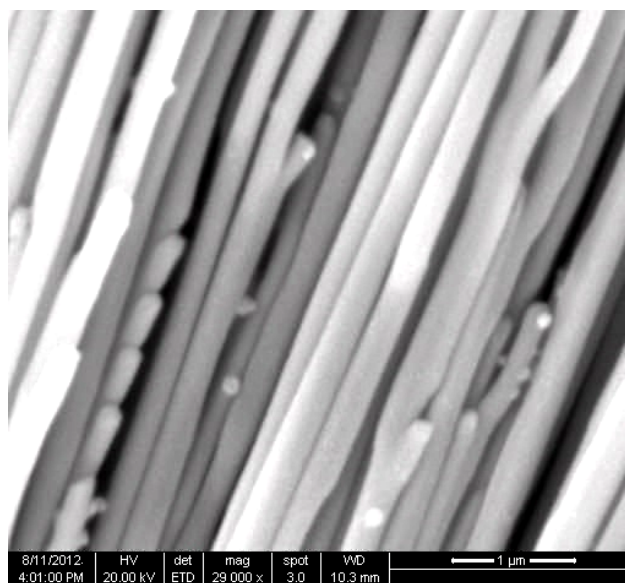

**Figure S1.** FESEM micrograph of the as prepared Ni NWs.

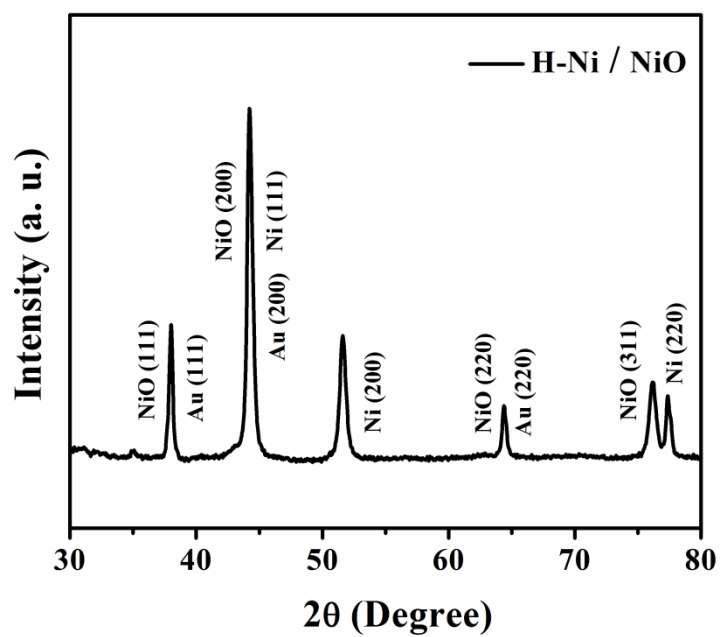

**Figure S2.** The XRD pattern of the as-prepared H-Ni/NiO core/shell NWs.

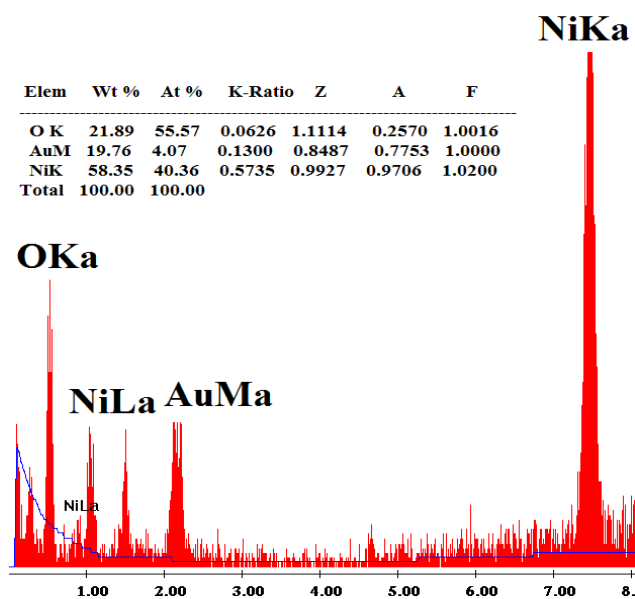

Figure S3. The EDAX spectrum of the H-Ni/NiO core/shell NHs.

## ELECTROCHEMICAL ANALYSIS

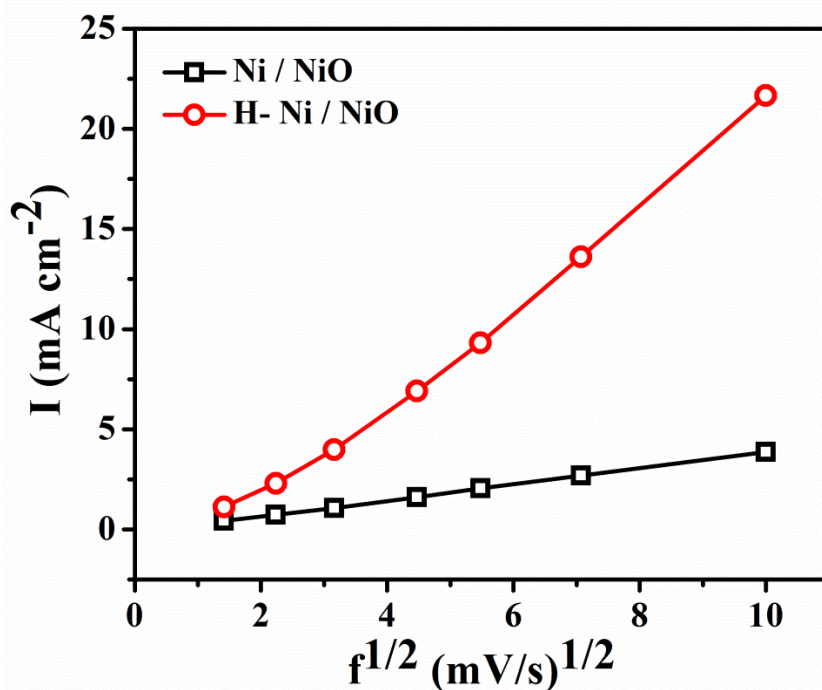

Figure S4. Peak current ( $I$ ) vs. square root of scan rate ( $f$ ) plot for both types of capacitors.

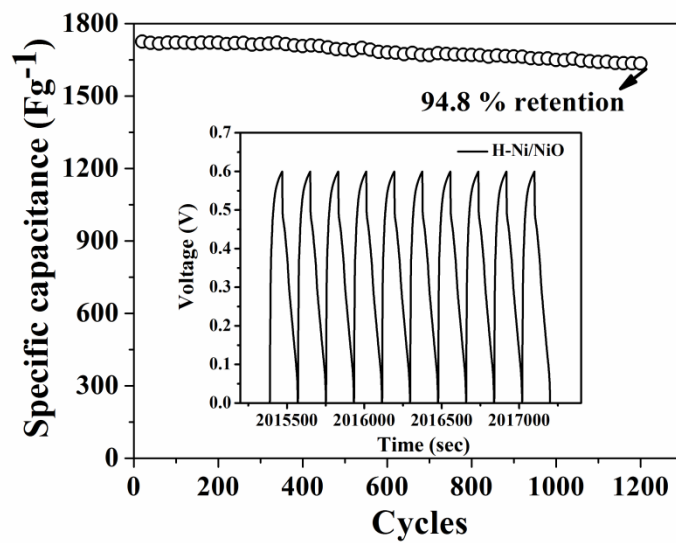

**Figure S5.** Cyclic performance of H-Ni/NiO core/shell NHs at a current density of  $8.6 \text{ Ag}^{-1}$ . The inset shows the charging/discharging curves for last 10 cycles of H-Ni/NiO core/shell NHs at a current density of  $8.6 \text{ Ag}^{-1}$
